# Supplementary material for: EbbHLH80 Enhances Salt Responses by Up-Regulating Flavonoid Accumulation and Modulating ROS Levels
Source: MDPI journal article supplement (doi:10.3390/ijms241311080), 2023-07-04
Supplement: s1 [file s1]

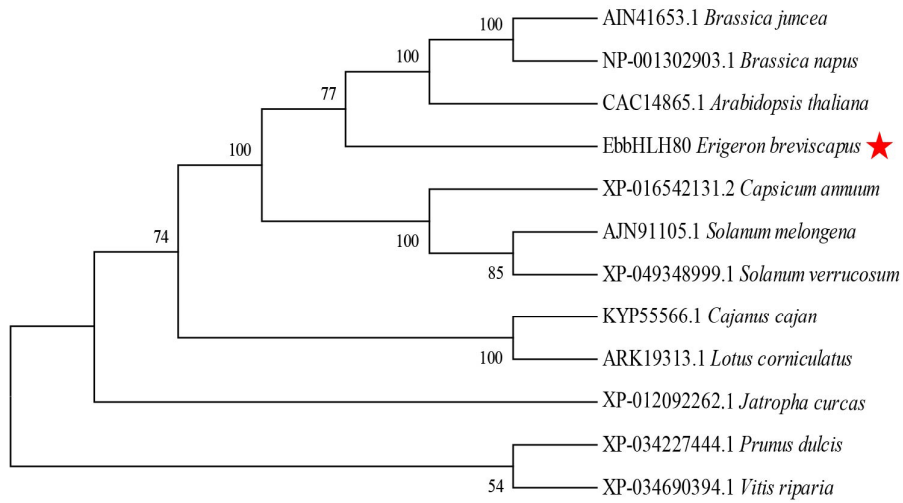

Figure S1 Phylogenetic tree of EbbHLH80 protein and related homologs in different species. Branch length is proportional to distance.
